# Supplementary material
Source: PubMed Central journal article supplement (PMC2854294)
Supplement: NIHMS167520-supplement-01.pdf [file NIHMS167520-supplement-01.pdf]

Table S1. Summary of beacon performance per operator by visual analysis

| Operator | Performance | Beacon sensitivity and specificity (%) |     |     |     |     | Overall |
|----------|-------------|----------------------------------------|-----|-----|-----|-----|---------|
|          |             | A                                      | B   | C   | D   | E   |         |
| 1        | Sensitivity | 100                                    | 93  | 100 | 85  | 5   | 59      |
|          | Specificity | 100                                    | 100 | 100 | 100 | 100 | 100     |
| 2        | Sensitivity | 100                                    | 93  | 50  | 90  | 0   | 57      |
|          | Specificity | 100                                    | 99  | 100 | 100 | 100 | 98      |
| 3        | Sensitivity | 0                                      | 87  | 50  | 85  | 14  | 63      |
|          | Specificity | 100                                    | 98  | 100 | 100 | 100 | 98      |
| 4        | Sensitivity | 100                                    | 100 | 100 | 90  | 67  | 93      |
|          | Specificity | 80                                     | 68  | 81  | 74  | 78  | 52      |

Light shade, beacon with poorest performance for each operator

Table S2. Distribution of mutations and corresponding amino acid changes within the 81-bp region of *rpoB* in drug-resistant isolates from Colombia and the Texas-Mexico border

| Beacon | Affected codon <sup>a</sup> | Codon change <sup>b</sup> | Amino acid change <sup>b</sup> | Colombia (n=29) <sup>c</sup> | Texas-Mexico border (n=22) <sup>c</sup> |
|--------|-----------------------------|---------------------------|--------------------------------|------------------------------|-----------------------------------------|
| A      | 428                         | AGC → <b>AGG</b>          | Ser → Arg                      | 1 (3%)                       | 0 (0%)                                  |
|        | 429                         | CAG → <b>CAC</b>          | Gln → His                      | 0 (0%)                       | 1 (5%)                                  |
|        | 430                         | CTG → <b>ATG</b>          | Leu → Met                      | 1 (3%)                       | 0 (0%)                                  |
| B      | 433                         | TTC → <b>TTI</b>          | Phe → Phe <sup>d</sup>         | 0 (0%)                       | 1 (5%)                                  |
|        | 435                         | GAC → <b>IAC</b>          | Asp → Tyr                      | 1 (3%)                       | 1 (5%)                                  |
|        | 435                         | GAC → <b>GIC</b>          | Asp → Val                      | 5 (14%)                      | 2 (10%)                                 |
|        | 435                         | GAC → <b>GGC</b>          | Asp → Gly                      | 0 (0%)                       | 1 (5%)                                  |
|        | 435                         | GAC → <b>GAG</b>          | Asp → Glu                      | 0 (0%)                       | 1 (5%)                                  |
|        | 435-436                     | <b>ΔGAC CAG</b>           | ΔAspGln                        | 0 (0%)                       | 1 (5%)                                  |
| C      | 441                         | TCG → <b>ACG</b>          | Ser → Thr                      | 2 (6%)                       | 0 (0%)                                  |
|        | 441                         | TCG → <b>TTC</b>          | Ser → Phe                      | 2 (6%)                       | 0 (0%)                                  |
| D      | 445                         | CAC → <b>IAC</b>          | His → Tyr                      | 2 (6%)                       | 1 (5%)                                  |
|        | 445                         | CAC → <b>AAC</b>          | His → Asn                      | 1 (3%)                       | 1 (5%)                                  |
|        | 445                         | CAC → <b>GAC</b>          | His → Asp                      | 2 (6%)                       | 6 (29%)                                 |
|        | 445                         | CAC → <b>CGC</b>          | His → Arg                      | 0 (0%)                       | 4 (19%)                                 |
|        | 447                         | CGC → <b>CGI</b>          | Arg → Arg <sup>d</sup>         | 2 (6%)                       | 0 (0%)                                  |
| E      | 450                         | TCG → <b>TIG</b>          | Ser → Leu                      | 18 (49%)                     | 1 (5%)                                  |
|        | 450                         | TCG → <b>TGG</b>          | Ser → Trp                      | 1 (3%)                       | 0 (0%)                                  |
|        | 450                         | TCG → <b>TAC</b>          | Ser → Tyr                      | 0 (0%)                       | 1 (5%)                                  |
|        | 450                         | TCG → <b>CGC</b>          | Ser → Arg                      | 0 (0%)                       | 1 (5%)                                  |

<sup>a</sup> Codon number based on *M. tuberculosis rpoB* (accession no. AE000516, nucleotides 761762-765298) with changed nucleotide shown in underlined bold; codon 447 was not covered by the beacons used in this study (shaded); <sup>b</sup> arrows indicate change from wild-type to mutant; ; <sup>c</sup> data expressed as n(column %); <sup>d</sup> silent mutations

Table S3. Quantification potential of beacon qPCR using known proportions of DNA from wild-type and mutant bacteria for beacon B<sup>a</sup>

| DNA mix<br>wildtype + mutant<br>for beacon B | Expected         |               | No. targets<br>detected in<br>beacon B | Observed         |               |
|----------------------------------------------|------------------|---------------|----------------------------------------|------------------|---------------|
|                                              | Wild-type<br>(%) | Mutant<br>(%) |                                        | Wild-type<br>(%) | Mutant<br>(%) |
| 1000 + 0                                     | 100              | 0             | 726                                    | 100              | 0             |
| 700 + 300                                    | 70               | 30            | 538                                    | 74               | 26            |
| 500 + 500                                    | 50               | 50            | 312                                    | 43               | 57            |
| 300 + 700                                    | 30               | 70            | 253                                    | 35               | 65            |
| 100 + 900                                    | 10               | 90            | 45                                     | 6                | 94            |
| 1 + 999                                      | 1                | 99            | 0                                      | 0                | 100           |
| 0 + 1000                                     | 0                | 100           | 0                                      | 0                | 100           |

<sup>a</sup> Different ratios of DNA from a strain with no detectable Ct for beacon B (assumed 100% mutations) and DNA from another strain with a Ct suggesting no mutations in 100% of the bacteria were mixed in different proportions in the laboratory to evaluate the quantification potential of beacon qPCR. A total of 103 genomes were added per qPCR reaction for these experimental specimens, in parallel with a standard curve for beacon B which contained known amounts of wild-type DNA target as reference. The number of targets detected by beacon B is shown (# targets detected in beacon B), and percentage of mutants versus wild-type was estimated using as a reference the number of targets detected for beacon B when no mutations were added (1000 wild-type genomes, 726 targets).

|   | Beacon A |         | Beacon B |         | Beacon C |         | Beacon D |         | Beacon E |         | Beacon 16S rRNA |         |
|---|----------|---------|----------|---------|----------|---------|----------|---------|----------|---------|-----------------|---------|
| A | S1       | S1      | S1              | S1      |
| B | S2       | S2      | S2              | S2      |
| C | S3       | S3      | S3              | S3      |
| D | S4       | S4      | S4              | S4      |
| E | S5       | S5      | S5              | S5      |
| F | S6       | S6      | S6              | S6      |
| G | CDC1551  | CDC1551 | CDC1551         | CDC1551 |
| H | NTC      | NTC     | NTC             | NTC     |
|   | 1        | 2       | 3        | 4       | 5        | 6       | 7        | 8       | 9        | 10      | 11              | 12      |

Fig S1. 96-well plate design. Every plate was loaded with six experimental strains (S1-S6; rows A thru F), a wild-type reference strain (CDC1551; row G), and a non-template control (NTC; row H). Beacons A – E for *rpoB* (columns 1 thru 10) and 16S rRNA for *M. tuberculosis* species confirmation (columns 11-12) were run in duplicates for each strain.

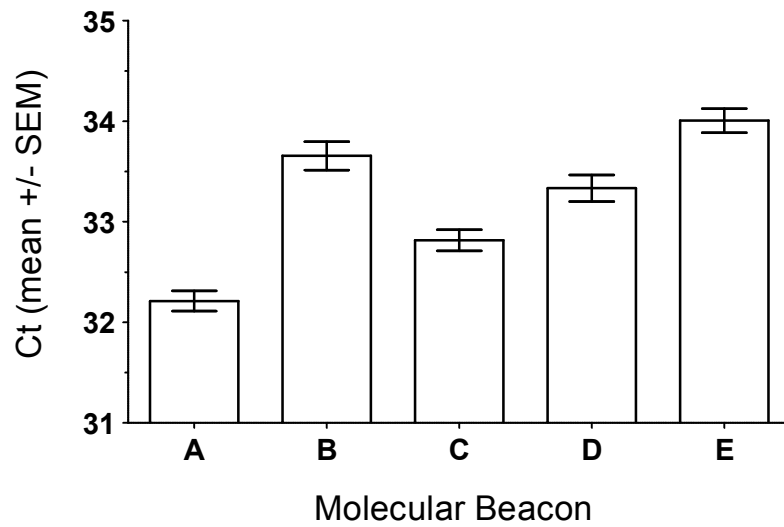

Fig S2. Efficiency, distribution and reproducibility of beacons A-E for strain CDC1551 for the 18 96-well plates ran in this study. Beacon A had a consistently lower raw Ct (mean±SEM; 32.2±0.10), followed by C (32.8±0.10), D (33.3±0.13), B (33.7±0.14) and E (34.0±0.12).
